# Supplementary material for: Ion identity molecular networking for mass spectrometry-based metabolomics in the GNPS environment
Source: PubMed Central journal article supplement (PMC8219731; doi:10.1038/s41467-021-23953-9), 2021-06-22
Supplement: 41467_2021_23953_MOESM1_ESM.pdf [file 41467_2021_23953_MOESM1_ESM.pdf]

## Supplementary Information

# Ion Identity Molecular Networking for mass spectrometry-based metabolomics in the GNPS environment

Robin Schmid<sup>1,2#</sup>, Daniel Petras<sup>2,3#</sup>, Louis-Félix Nothias<sup>2#</sup>, Mingxun Wang<sup>2</sup>, Allegra T. Aron<sup>2</sup>, Annika Jagels<sup>4</sup>, Hiroshi Tsugawa<sup>5,6</sup>, Johannes Rainer<sup>7</sup>, Mar Garcia-Aloy<sup>7</sup>, Kai Dührkop<sup>8</sup>, Ansgar Korf<sup>1</sup>, Tomáš Pluskal<sup>9</sup>, Zdeněk Kameník<sup>10</sup>, Alan K. Jarmusch<sup>2</sup>, Andrés Mauricio Caraballo-Rodríguez<sup>2</sup>, Kelly C. Weldon<sup>2</sup>, Melissa Nothias-Esposito<sup>2</sup>, Alexander A. Aksenov<sup>2,11</sup>, Anelize Bauermeister<sup>2,12</sup>, Andrea Albarracin Orio<sup>13</sup>, Carlismari O. Grundmann<sup>2,14</sup>, Fernando Vargas<sup>2</sup>, Irina Koester<sup>3</sup>, Julia M. Gauglitz<sup>2</sup>, Emily C. Gentry<sup>2</sup>, Yannick Hövelmann<sup>4</sup>, Svetlana A. Kalinina<sup>4</sup>, Matthew A. Pendergraft<sup>3</sup>, Morgan Panitchpakdi<sup>2</sup>, Richard Tehan<sup>15</sup>, Audrey Le Gouellec<sup>16</sup>, Gajender Aleti<sup>17</sup>, Helena Mannocho Russo<sup>2,18</sup>, Birgit Arndt<sup>4</sup>, Florian Hübner<sup>4</sup>, Heiko Hayen<sup>1</sup>, Hui Zhi<sup>19</sup>, Manuela Raffatellu<sup>19,20</sup>, Kimberly A. Prather<sup>3</sup>, Lihini I. Aluwihare<sup>3</sup>, Sebastian Böcker<sup>8</sup>, Kerry L. McPhail<sup>15</sup>, Hans-Ulrich Humpf<sup>4</sup>, Uwe Karst<sup>1</sup>, Pieter C. Dorrestein<sup>2,11\*</sup>

1. Institute of Inorganic and Analytical Chemistry, University of Münster, Münster, Germany
2. Skaggs School of Pharmacy and Pharmaceutical Sciences, University of California San Diego, La Jolla, San Diego, CA, USA
3. Scripps Institution of Oceanography, University of California San Diego, La Jolla, CA, US
4. Institute of Food Chemistry, University of Münster, Münster, Germany
5. RIKEN Center for Sustainable Resource Science, Yokohama, Kanagawa, Japan
6. RIKEN Center for Integrative Medical Sciences, Yokohama, Kanagawa, Japan
7. Institute for Biomedicine, Eurac Research, Affiliated Institute of the University of Lübeck, Bolzano, Italy
8. Chair for Bioinformatics, Friedrich-Schiller-University, Jena, Germany
9. Institute of Organic Chemistry and Biochemistry, Czech Academy of Sciences, Prague, Czech Republic
10. Institute of Microbiology, Czech Academy of Sciences, Prague, Czech Republic
11. Collaborative Mass Spectrometry Innovation Center, University of California San Diego, La Jolla, San Diego, CA, USA
12. Institute of Biomedical Sciences, Universidade de São Paulo, São Paulo, SP, Brazil
13. IRNASUS, Universidad Católica de Córdoba, CONICET, Facultad de Ciencias Agropecuarias. Córdoba, Argentina
14. School of Pharmaceutical Sciences of Ribeirão Preto, Universidade de São Paulo, Ribeirão Preto, SP, Brazil
15. Department of Pharmaceutical Sciences, College of Pharmacy, Oregon State University, Corvallis, OR, USA
16. Univ. Grenoble Alpes, CNRS, Grenoble INP, CHU Grenoble Alpes, TIMC-IMAG, Grenoble, France
17. Department of Psychiatry, University of California San Diego, San Diego, CA, USA

18. NuBBE, Institute of Chemistry, São Paulo State University (UNESP), Araraquara, SP, Brazil
19. Division of Host-Microbe Systems & Therapeutics, Department of Pediatrics, University of California San Diego, La Jolla, CA, USA
20. Chiba University-UC San Diego Center for Mucosal Immunology, Allergy and Vaccines (CU-UCSD cMAV), La Jolla, CA, USA

\*Correspondence should be addressed to [pdorrestein@ucsd.edu](mailto:pdorrestein@ucsd.edu)

# These authors contributed equally

### **Content:**

- Page 3-4: Supplemental Notes
- Page 5-9: Supplemental Figures
- Page 10-19: Supplemental Tables
- Page 20-21: Supplemental References

## Supplementary Note 1: Metal-binding compounds and ionophores

Ion identity molecular networking can be used in combination with native ESI-based metabolomics<sup>12</sup> to find biologically-relevant metal-binding compounds or to elucidate metal-binding preferences of known or novel metal-binding molecules (Zhi, H. et al., submitted). One recent example in which IIMN was instrumental in understanding metal-binding and selectivity is yersiniabactin. We identified yersiniabactin as a novel zincophore produced by *E. coli* Nissle by performing post-liquid chromatography (LC) pH adjustment (to pH 6.8) and infusion of zinc acetate solution, followed by mass spectrometry and ion identity molecular networking. With this strategy, mass spectrometry features with correlated peak shapes and retention times, in addition to an  $m/z$  difference resulting from zinc-binding ( $+Zn^{2+} -H^+$ ) were found. These results are summarized in Supplementary Figure 3. While this example highlights the discovery of a zinc-binding molecule explicitly, IIMN has been used in conjunction with the infusion of other metals, including iron, copper, and cobalt, to find siderophores and other ionophores. Molecular formulas were predicted with SIRIUS 4.0 after exporting MS<sup>1</sup> isotope pattern and MS<sup>2</sup> spectra as a data processing step in MZmine. The IIMN job can be accessed on GNPS (<https://gnps.ucsd.edu/ProteoSAFe/index.jsp?task=525fd9b6a9f24455a589f2371b1d9540>).

## Supplementary Note 2: Compound structure information

The ion identity molecular networking results for the *Stachybotrys chartarum* dataset (MSV000084134) prove that the ion identity annotations can yield structure relevant information. Putative molecular formula modifications (+O and +H<sub>2</sub>O) between chemical compounds can be verified by the maximum number of water losses that were annotated by IIN. The difference in the number of oxygens in the molecular formulas of phenylspirodrimane derivatives is reflected in additional losses of H<sub>2</sub>O within the corresponding IINs. The results are depicted in Supplementary Figure 5 as combined IIMN networks (a) and with collapsed ion identity networks (b). The IIMN job can be accessed on GNPS (rerun of the original job after additional spectral library entries were added to the GNPS spectral libraries: <https://gnps.ucsd.edu/ProteoSAFe/status.jsp?task=3bd4def5e0e348c9b113f4a072f03ea9>).

### Supplementary Note 3: Implementation of orthogonal supplementary edges

Ion identity molecular networking was the initial driver to implement the option of supplementary edges into the FBMN workflow on GNPS. However, based on the generic format, any tool can create and export new relationships between features to link the corresponding nodes in feature-based molecular networks. As an example, we have implemented a new MZmine module to annotate neutral mass differences between ion identity networks as putative chemical modifications, in the format of supplementary edges. These edges connect two IIN if the neutral mass difference matches a user-defined modifications list.

The IIMN MZmine workflow was applied to a dataset of 88 bile acid extracts from feces and gall bladder of various animals (MSV000084170). IIN modification edges were based on the mass differences of +methyl (Me, CH<sub>2</sub>), +O, and +H<sub>2</sub>O. To exemplify the results, Supplementary Figure 6 shows a network cluster of glycocholic acid analogs. Library matching annotated most of the ion identity networks as glycine conjugated bile acids; Two IINs as glycocholic acid (+isomers) and two IINs as glycodeoxycholic acid (+isomers) with a mass accuracy of <2 ppm. The additional modification edges connect these structurally related compounds and increase the network density. Moreover, they help to infer putative molecular formulas and modified structures from an FBMN. In a second analysis of the same dataset, IINs were connected based on mass differences of the modification by taurine, glycine, and alanine conjugation. This resulted in additional links between conjugated and free bile acid forms of cholic acid and deoxycholic acid. The IIMN jobs can be accessed on GNPS.

#### IIMN

<https://gnps.ucsd.edu/ProteoSAFe/status.jsp?task=0a3f4399e5344188805e5856b756d918>

#### IIMN: Methyl (Me, CH<sub>2</sub>), O, and H<sub>2</sub>O modification edges

<https://gnps.ucsd.edu/ProteoSAFe/status.jsp?task=465d7285380942a0828e462d1db027c2>

#### IIMN: Taurine, glycine, and alanine modification edges

<https://gnps.ucsd.edu/ProteoSAFe/status.jsp?task=69b40f808b2047d89fccf3d07e79fc59>

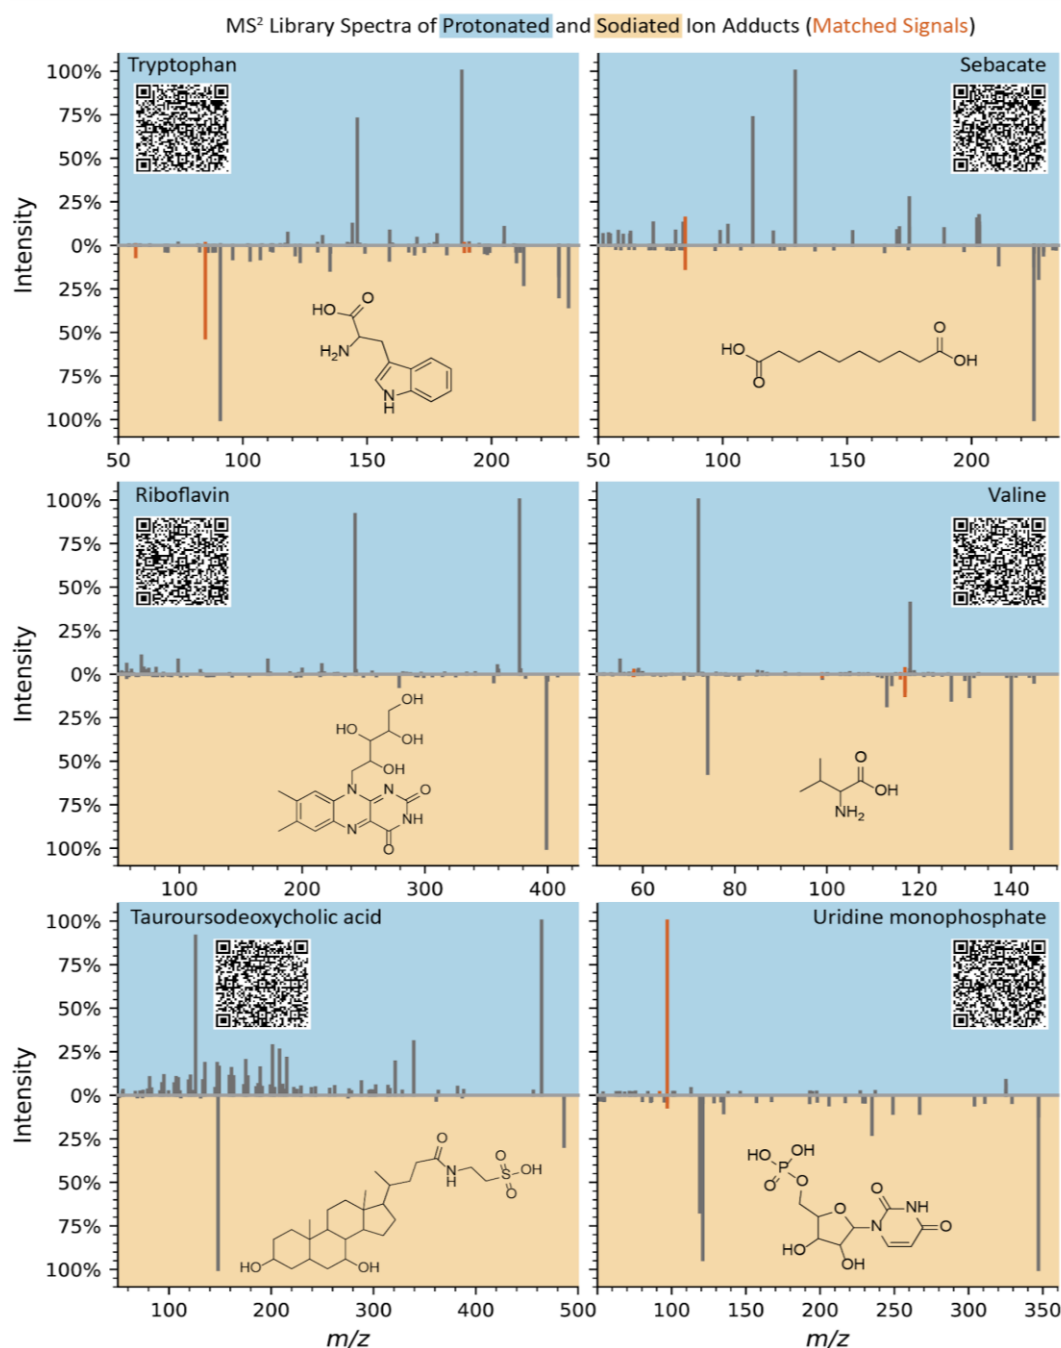

**Supplementary Figure 1: Comparison of MS<sup>2</sup> library spectra for sodiated and protonated ion species of six compounds.** The spectral mirror charts show MS<sup>2</sup> library spectra of the same compound as [M+H]<sup>+</sup> (top plot) and [M+Na]<sup>+</sup> (bottom plot). Due to high in-source fragmentation and low [M+H]<sup>+</sup> abundance, tauroursodeoxycholic acid compares the [M-H<sub>2</sub>O+H]<sup>+</sup> and [M+Na]<sup>+</sup> MS<sup>2</sup> library spectra. Matched signals in mirror charts are highlighted (dark orange). These charts exemplify a commonly seen difference in fragmentation behavior for sodiated and protonated ion adducts. All library spectra are publicly available in the GNPS spectral libraries. The charts were created with the Metabolomics Spectrum Resolver (<https://metabolomics-usi.ucsd.edu/>) and scannable QR-codes link out to the individual annotated charts and library spectra with their metadata.

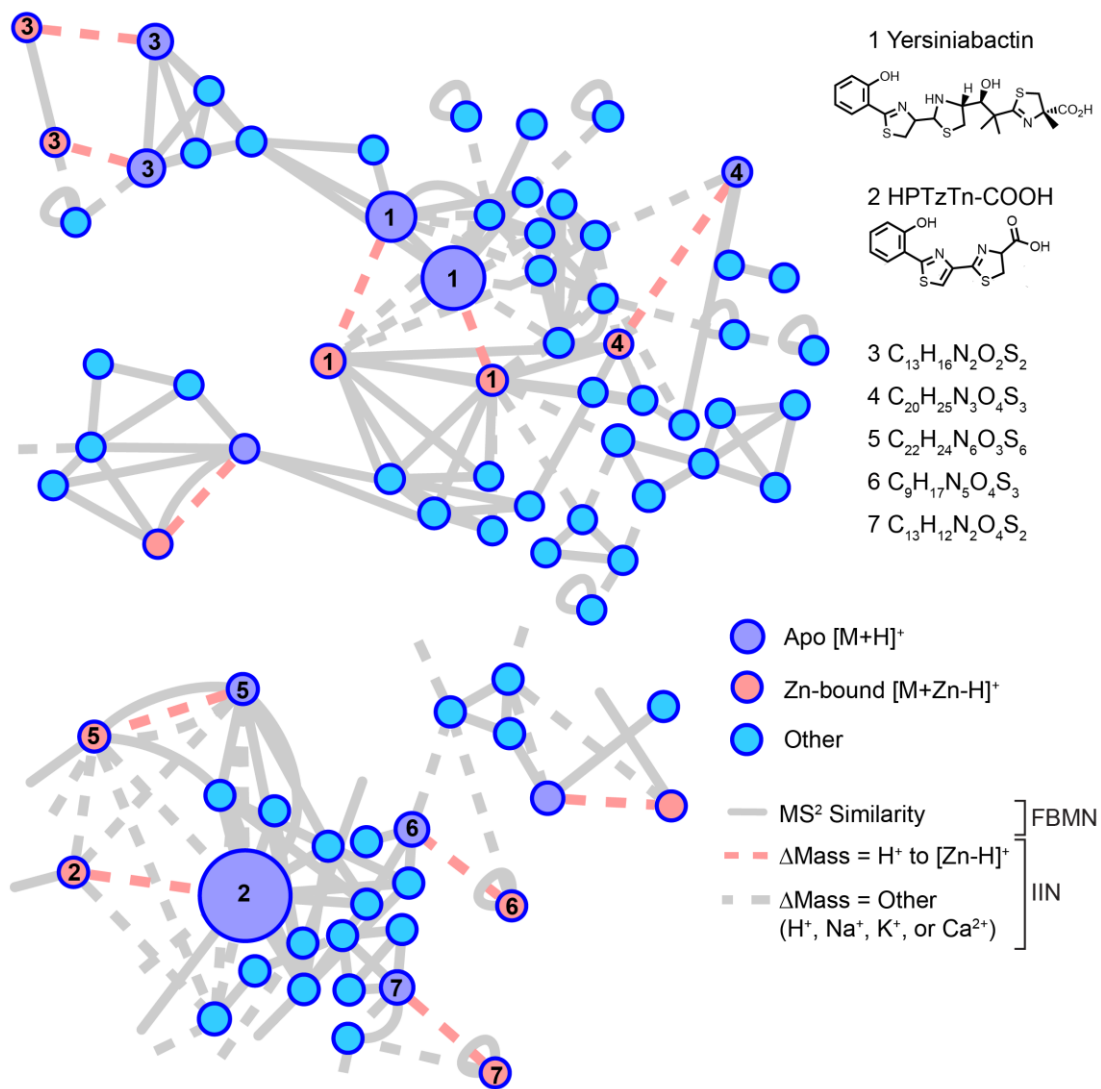

**Supplementary Figure 2: Use case for the discovery of metal-binding compounds and ionophores.** IIMN in conjunction with native spray metal metabolomics<sup>12</sup> facilitated the discovery of yersiniabactin as a zincophore produced by *E. coli* Nissle (Zhi, H. et al., *submitted*). Zinc-binding molecules, such as yersiniabactin and other potential derivatives or truncations, are shown in salmon, while the corresponding protonated form of these molecules is shown in purple; other nodes are colored light blue. Structures and molecular formulas (generated using SIRIUS 4.0) for compounds 1-7 are provided.

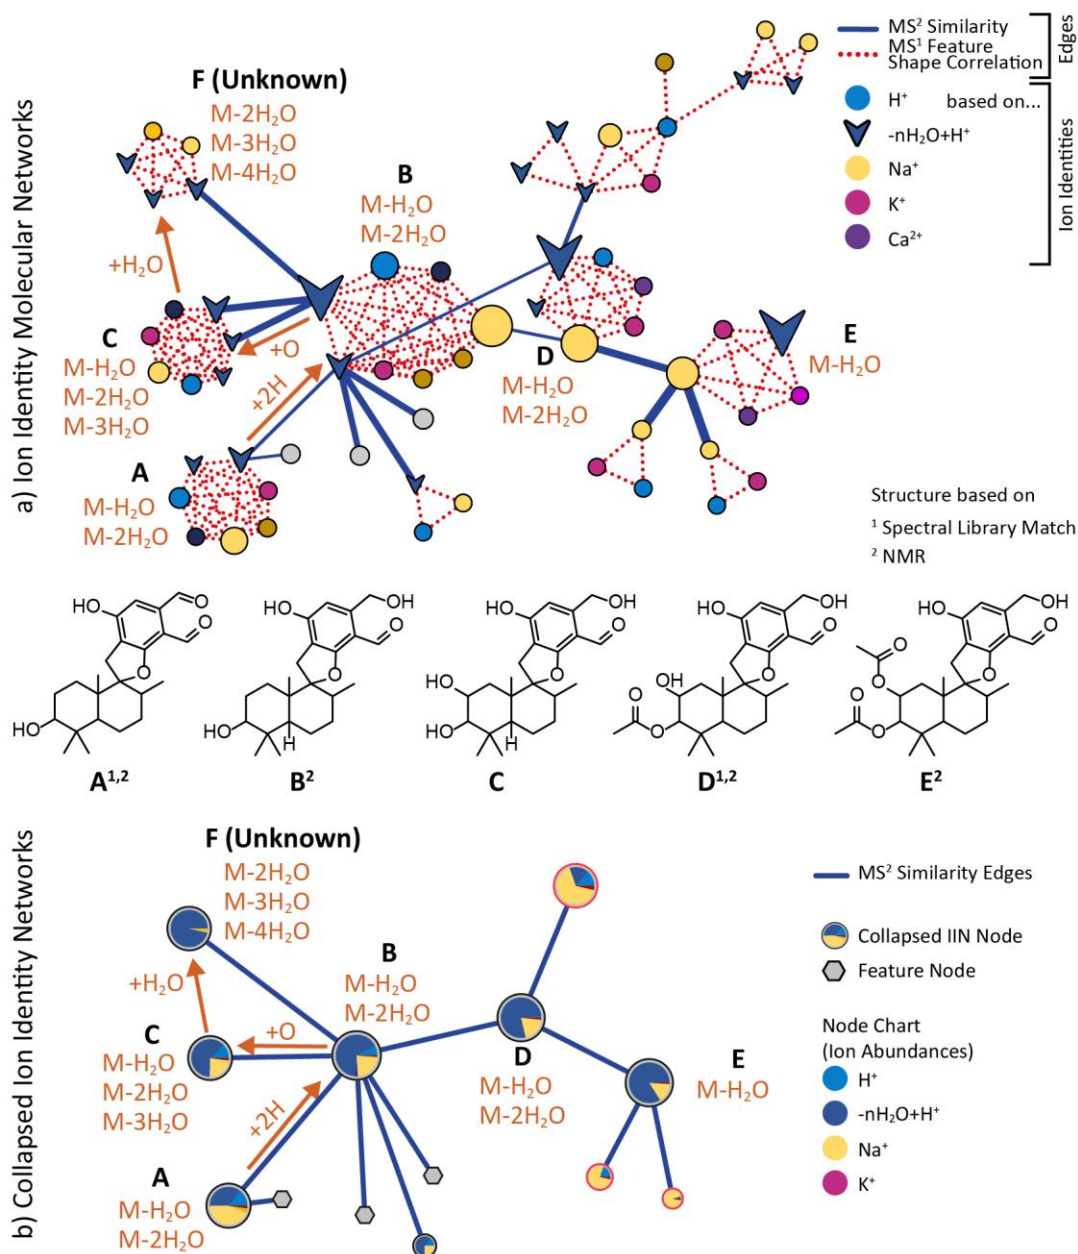

**Supplementary Figure 3: Ion identity molecular networking results for *Stachybotrys chartarum* liquid culture extracts (MSV000084134).** The presented two visualization options compare the combined ion identity molecular network (a), with all ion identities of the same compound sorted in circles, and a collapsed IIN network version (b), with pie-charts representing the relative ion abundances of the corresponding compounds. Compounds A and D were annotated by spectral library match and compounds A, B, D, and E were verified by nuclear magnetic resonance (NMR) spectroscopy<sup>27</sup>. Modifications between compounds are based on the compound structures or the differences of the average neutral masses for each IIN. The modifications of +O and +H<sub>2</sub>O from B to C to F can also be deduced from the ion identity annotations, as the maximum in-source water losses for each compound confirm the addition of oxygens; Compounds A, B, and D (-2H<sub>2</sub>O maximum water losses), compound C (-3H<sub>2</sub>O), and compound F (-4H<sub>2</sub>O). Therefore, this example proves that IIN can yield structure relevant information which facilitates structure annotation and propagation.



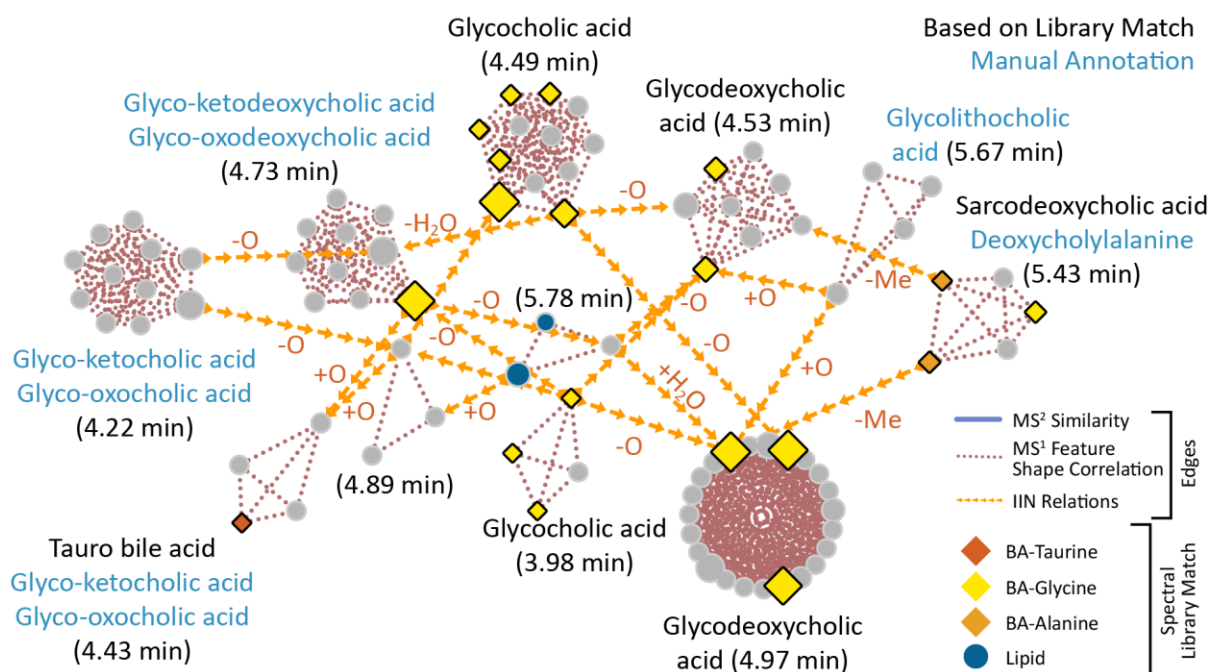

**Supplementary Figure 4: Use case for supplementary edges to spot compound modifications.** Ion identity networks were linked by additional edges based on neutral mass differences matching those of methyl (Me, CH<sub>2</sub>), O, or H<sub>2</sub>O. MS<sup>2</sup> spectral similarity edges are hidden to reduce visualization complexity. Spectral library matching annotated two IINs as glycocholic acid (+isomers) and two IINs as glycodeoxycholic acid (+isomers). The new additional modification edges helped to infer putative annotations for six IINs, moreover, in the resulting IIMN, related compounds clustered closer and with more connections.

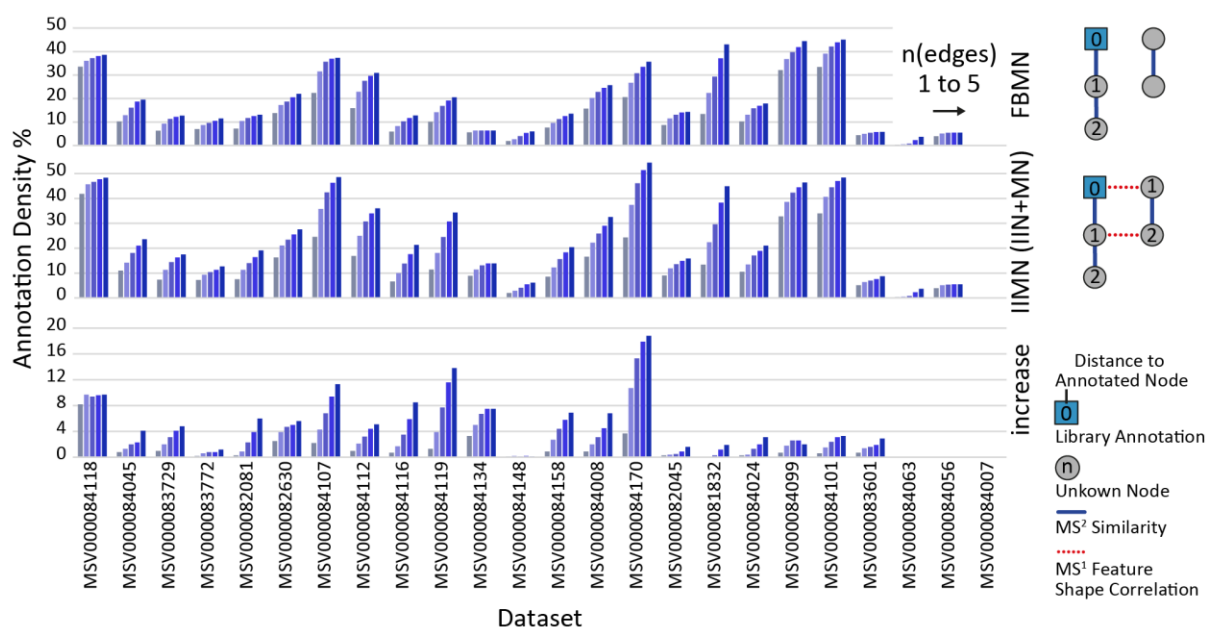

**Supplementary Figure 5: Compound annotation densities for maximum distances over 1 to 5 edges to an annotated node.** From top to bottom, nodes that are connected to at least one annotated compound by  $n$  FBMN edges (top), by IIMN (IIN+FBMN) edges (middle), and the differential increase of annotation density by adding IIN to FBMN (bottom). The increase over one edge corresponds to unknown features (nodes) which are directly connected by an IIN edge to an annotated compound (maximum increase +8%). Source data are provided as a Source Data file.

## Feature Grouping Based on Pearson Correlation of...

### a) Feature Shape (Intra Sample)

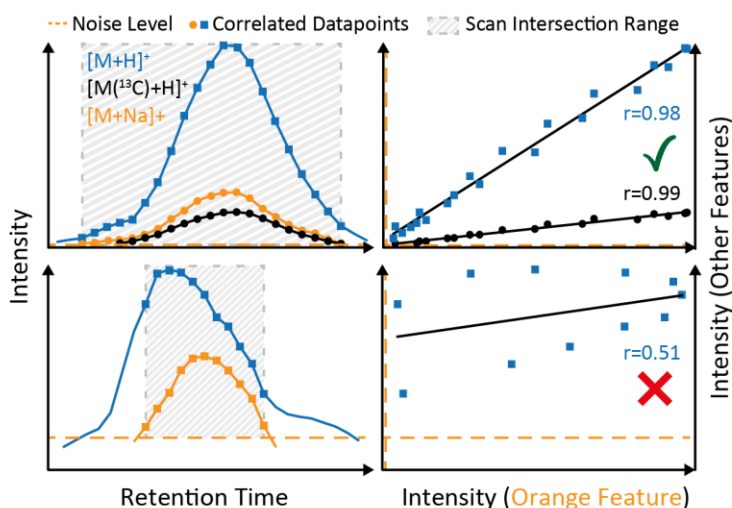

### b) Feature Height (Across Samples)

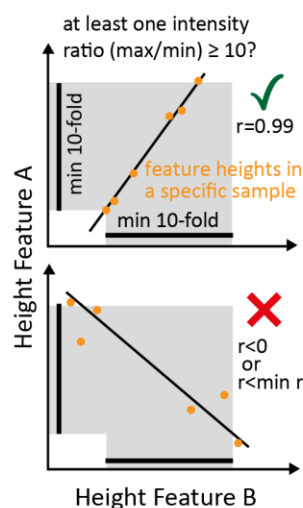

### c) MS<sup>1</sup> Ion Identity Networking (IIN)

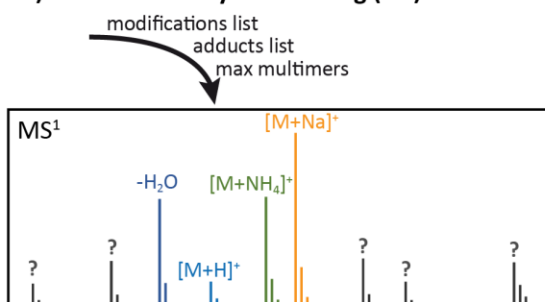

### d) Add More Ions to Existing Networks

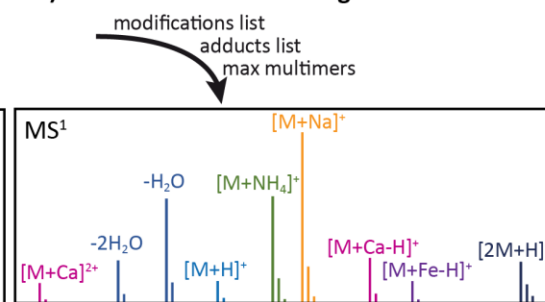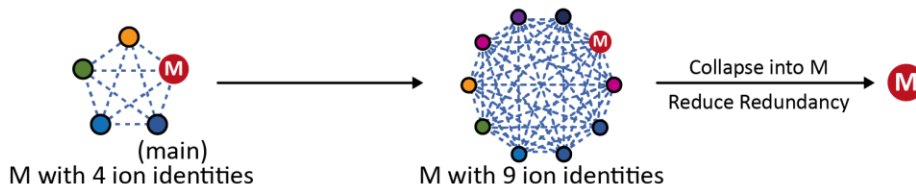

**Supplementary Figure 6: Schematic workflow for feature grouping (metaCorrelate) and ion identity networking within MZmine.** After preselecting features that are in a retention time window and have a minimum overlapping retention time percentage (measured on the smaller feature for each tested pair), features are grouped if **a)** their shapes (intensity profiles) and **b)** their heights across all samples resolve to Pearson correlation coefficients ( $r$ ) of user-defined thresholds. Optionally, both correlation filters can be omitted or switched to a cosine score similarity threshold. By turning off both filters, the grouping is solely based on the retention time window and overlap prefilters. Ion identity networking uses an in-source modifications list, an adducts list, and a “maximum multimers number” parameter to create a library of MS<sup>1</sup> ion identities. To create annotation networks, all pairs of ion identities are applied to all pairs of grouped features to calculate the neutral mass of the corresponding feature ( $m/z$ ) with an ion identity (mass difference, charge ( $z$ ), and multimer number). After **c)**, the initial creation of ion identity networks with a user-defined library of main ion identities, more uncommon ion identities can **d)** be added iteratively to existing networks.

**Supplementary Table 1:** LC-MS<sup>2</sup> datasets used for the evaluation of ion identity molecular networking. All datasets are publicly available through their corresponding ID in the MassIVE repository ([massive.ucsd.edu](http://massive.ucsd.edu)).

| #  | Dataset Name                                        | Sample Origin                                | Dataset Description                                                                                                                        | Organism Name                        | MassIVE ID   |
|----|-----------------------------------------------------|----------------------------------------------|--------------------------------------------------------------------------------------------------------------------------------------------|--------------------------------------|--------------|
| 1  | B. Sub knockout                                     | <i>B. subtilis</i>                           | Extracts from <i>B. sub</i> wildtype and srf-KO cell culture                                                                               | <i>Bacillus subtilis</i>             | MSV000082081 |
| 2  | Coral Reef Sea Water                                | Seawater                                     | Spatial survey of Coral Reef in Hawaii, filtered and unfiltered samples                                                                    | Seawater                             | MSV000084116 |
| 3  | Drug Metabolism Tsunoda                             | Human                                        | Human blood (plasma) prepared using Phree kit, individuals given 4 different drugs (omeprazole, dextromethorphan, caffeine, and midazolam) | <i>Homo sapiens</i>                  | MSV000084008 |
| 4  | SD Cheetahs                                         | Cheetah                                      | Fecal samples from cheetahs in human care                                                                                                  | <i>Acinonyx jubatus</i>              | MSV000084099 |
| 5  | Nascent Sea Spray Aerosol                           | Seawater                                     | isolated sea spray aerosol                                                                                                                 | Seawater                             | MSV000084119 |
| 6  | Fungus-Growing T. septentrionalis Gardens           | Ants fungus garden extracts                  | DCM:MeOH 2:1 extracts from <i>Trachymyrmex septentrionalis</i> fungus gardens.                                                             | <i>Trachymyrmex septentrionalis</i>  | MSV000084024 |
| 7  | HMP cultures full set                               | Various bacterial cultures                   | Extracts of HMP project isolates that were grown successfully in three different media                                                     | 433 various bacteria                 | MSV000082045 |
| 8  | Foodomics subset                                    | Diverse foods                                | Subset of food samples from Global FoodOmics project                                                                                       | Various foods                        | MSV000084101 |
| 9  | Stromatolites tissue                                | Intertidal - freshwater/marine stromatolites | Extracts from South African stromatolite cores, and San Diego                                                                              | Cyanobacteria/Heterotrophic bacteria | MSV000083729 |
| 10 | Stromatolites DOM                                   | Intertidal - freshwater/marine DOM           | DOM/TOM analysis of water from SA stromatolite barrage pool                                                                                | Cyanobacteria/Heterotrophic bacteria | MSV000083772 |
| 11 | Bacteria from Rocas Atoll                           | Sediments from Rocas Atoll                   | Extracts produced by marine bacteria in liquid cultures                                                                                    | Bacteria                             | MSV000083601 |
| 12 | <i>B. subtilis</i> extracted cell-free supernatants | <i>B. subtilis</i>                           | Methanol extracts from cell-free supernatants of <i>B. subtilis</i> wild strains                                                           | <i>Bacillus subtilis</i>             | MSV000084045 |
| 13 | SEED Grant - Sejal - Urine                          | Human                                        | Urine samples extracted in 80% MeOH of Disease-associated microbial species, for disease diagnosis and prevention of Type I diabetes       | <i>Homo sapiens</i>                  | MSV000084112 |

**Supplementary Table 1: continued**

| #  | Dataset Name                                    | Sample Origin                  | Dataset Description                                                                                                                                                                                                  | Organism Name                                     | MassIVE ID   |
|----|-------------------------------------------------|--------------------------------|----------------------------------------------------------------------------------------------------------------------------------------------------------------------------------------------------------------------|---------------------------------------------------|--------------|
| 14 | ONR Primary Wright - Human-Plasma               | Human                          | Dataset investigating the impact of sleep and circadian disruption on human plasma                                                                                                                                   | <i>Homo sapiens</i>                               | MSV000082630 |
| 15 | Basidiobolus                                    | Fungi, Zoopagomycota           | MeOH extract/RP-SPE fractions of <i>B. meristosporus</i> , grown in 7 growth conditions in triplicate. EtOAc extract/RP-SPE fractions of culture broths. Study aims to discover the product of bacterial-like NRPSs. | <i>Basidiobolus meristosporus</i>                 | MSV000084007 |
| 16 | Pseudonocardia Extracts Grouping - Illumina     | <i>Pseudonocardia</i>          | EtOAc extracts of 7 <i>Pseudonocardia</i> strains to discover if there some kind of grouping according to metabolomic content                                                                                        | <i>Pseudonocardia</i>                             | MSV000084056 |
| 17 | R_HAN_01.05                                     | <i>Mus musculus</i>            | Plasma serum from mice fed with prebiotics or antibiotics for 3 weeks                                                                                                                                                | <i>Mus musculus</i>                               | MSV000084107 |
| 18 | Tunicates - Euherdmania X Eudistoma vannahmei   | Marine organisms               | Extraction with MeOH of macerated organism                                                                                                                                                                           | <i>Euherdmania</i> and <i>Eudistoma vannahmei</i> | MSV000084063 |
| 19 | Saliva samples from caries and healthy children | Human                          | Saliva was lyophilized and non-polar molecules were extracted in ethyl acetate                                                                                                                                       | Oral microbiome                                   | MSV000081832 |
| 20 | Stachybotrys-WT-OE                              | Filamentous fungi              | Extracts from mycelium and filtrates                                                                                                                                                                                 | <i>Stachybotrys chartarum</i>                     | MSV000084134 |
| 21 | Urine biomarker discovery                       | Human                          | Diluted urine                                                                                                                                                                                                        | <i>Homo sapiens</i>                               | MSV000084148 |
| 22 | SeaScape2019 Bloom1+2                           | Seawater                       | Non-targeted metabolomics (DOM, 02 um surpore) from bulk water samples (1L) from SeaScape2019 Bloom1+2 from PPL(200mg) solid phase extraction. [doi:10.25345/C5HH23]                                                 | Seawater                                          | MSV000084158 |
| 23 | Animal bile acids                               | Animals (Lee Hagey collection) | Methanolic extracts of gall bladder or feces                                                                                                                                                                         | Various <i>vertebrata</i>                         | MSV000084170 |
| 24 | Adduct induction                                | Natural Products               | Post-column salt addition                                                                                                                                                                                            | Standards                                         | MSV000084118 |

**Supplementary Table 2:** Summary of statistical results on all 24 datasets. Refer to the provided Microsoft Excel workbook (SI\_IIMN\_dataset\_statistics.xlsx) for a full dataset resolved statistical summary and in-depth results for each dataset. Source data are provided as a Source Data file.

| <b>Statistical measure</b>          | <b>Mean %</b> | <b>Median %</b> | <b>Min %</b> | <b>Max %</b> |
|-------------------------------------|---------------|-----------------|--------------|--------------|
| Library matches                     | 6             | 4               | 0            | 23           |
| Ion identities                      | 14            | 14              | 2            | 43           |
| Ion identities with MS <sup>2</sup> | 12            | 11              | 2            | 35           |
| Library matches with ion identity   | 16            | 16              | 0            | 75           |
| Singletons (only FBMN edges)        | 43            | 39              | 23           | 91           |
| Singletons<br>(all edges)           | 38            | 34              | 22           | 80           |
| Reduced singletons                  | 5             | 3               | 0            | 30           |
| Nodes reduced by IIN                | 9             | 8               | 1            | 23           |

**Supplementary Table 3: LC-MS<sup>2</sup> spectral library summary.** For the statistical analysis of the ion identity coverage in available online resources, different spectral libraries were downloaded from MassBank of North America (MoNA) and GNPS and compared to the IIMN-based library, from the described workflow. MSMS-Chooser is a new workflow in the GNPS environment that focuses on the creation of spectral libraries with broader coverage of different ion identities. The currently available libraries based on MSMS-Chooser mainly contain spectral MS<sup>2</sup> entries for bile acids. All resources were downloaded on Dec, 17th 2019.

| Library Group                           | Library Name                                                                                                                                                                                                                                                                                                                                                                                                                                                                                                                                                                                                                                                                                                                                                                                            | Link                                                                                                                                                                                                                                                                                                                                                                                                         |
|-----------------------------------------|---------------------------------------------------------------------------------------------------------------------------------------------------------------------------------------------------------------------------------------------------------------------------------------------------------------------------------------------------------------------------------------------------------------------------------------------------------------------------------------------------------------------------------------------------------------------------------------------------------------------------------------------------------------------------------------------------------------------------------------------------------------------------------------------------------|--------------------------------------------------------------------------------------------------------------------------------------------------------------------------------------------------------------------------------------------------------------------------------------------------------------------------------------------------------------------------------------------------------------|
| MoNA <sup>25</sup>                      | LC-MS <sup>2</sup> (positive)                                                                                                                                                                                                                                                                                                                                                                                                                                                                                                                                                                                                                                                                                                                                                                           | <a href="https://mona.fiehnlab.ucdavis.edu/downloads">https://mona.fiehnlab.ucdavis.edu/downloads</a>                                                                                                                                                                                                                                                                                                        |
| GNPS <sup>2</sup>                       | <ul style="list-style-type: none"> <li>● GNPS Library</li> <li>● FDA Library Pt 1</li> <li>● FDA Library Pt 2</li> <li>● PhytoChemical Library</li> <li>● NIH Clinical Collection 1</li> <li>● NIH Clinical Collection 2</li> <li>● NIH Natural Products Library Round 1 (NIH)</li> <li>● NIH Natural Products Library Round 2 (NIH NPAC ACONN)</li> <li>● Pharmacologically Active Compounds in the NIH Small Molecule Repository</li> <li>● Faulkner Legacy Library provided by Sirenas MD</li> <li>● EMBL Metabolomics Core Facility (EMBL MCF)</li> <li>● Pesticides</li> <li>● Medicines for Malaria Venture Pathogen Box</li> <li>● LDB Lichen Database</li> <li>● GNPS Collections Miscellaneous</li> <li>● GNPS Collections Bile Acid Library 2019</li> <li>● MIADB Spectral Library</li> </ul> | <a href="https://gnps.ucsd.edu/ProteoSAFe/libraries.jsp">https://gnps.ucsd.edu/ProteoSAFe/libraries.jsp</a>                                                                                                                                                                                                                                                                                                  |
| MSMS-Chooser-based (GNPS) <sup>26</sup> | <ul style="list-style-type: none"> <li>● GNPS-MSMLS</li> <li>● GNPS Collections Bile Acid Library 2019</li> </ul>                                                                                                                                                                                                                                                                                                                                                                                                                                                                                                                                                                                                                                                                                       | <a href="https://gnps.ucsd.edu/ProteoSAFe/gnpslibrary.jsp?library=GNPS-MSMLS">https://gnps.ucsd.edu/ProteoSAFe/gnpslibrary.jsp?library=GNPS-MSMLS</a><br><a href="https://gnps.ucsd.edu/ProteoSAFe/gnpslibrary.jsp?library=BILELIB19">https://gnps.ucsd.edu/ProteoSAFe/gnpslibrary.jsp?library=BILELIB19</a>                                                                                                 |
| IIMN-based                              | <ul style="list-style-type: none"> <li>● Ion identity molecular networking-based library extracted from 24 publicly available datasets</li> <li>● Ion identity molecular networking-based library generated from the NIH Natural Products Library (NIH NPAC ACONN). All spectral entries were added to the existing manually created GNPS library.</li> </ul>                                                                                                                                                                                                                                                                                                                                                                                                                                           | <a href="https://gnps.ucsd.edu/ProteoSAFe/gnpslibrary.jsp?library=GNPS-IIMN-PROPOGATED">https://gnps.ucsd.edu/ProteoSAFe/gnpslibrary.jsp?library=GNPS-IIMN-PROPOGATED</a><br><a href="https://gnps.ucsd.edu/ProteoSAFe/gnpslibrary.jsp?library=GNPS-NIH-NATURALPRODUCTSLIBRARY_ROUND2_POSITIVE">https://gnps.ucsd.edu/ProteoSAFe/gnpslibrary.jsp?library=GNPS-NIH-NATURALPRODUCTSLIBRARY_ROUND2_POSITIVE</a> |

Supplementary Table 4: MZmine parameters for LC-MS<sup>2</sup> dataset processing.

| ID           | Samples | MS Instrument               | MS Resolution | Gradient [min] | Duty Cycle Time            | MS <sup>1</sup> threshold | MS <sup>2</sup> Threshold | MS Tolerance        | RT Tolerance [min] | Chromatogram Deconvolution Algorithm                                                             | MS <sup>2</sup> Paring m/z Tolerance | MS <sup>2</sup> Paring RT Tolerance [min] | Feature Alignment (m/z Tolerance, RT Tolerance, m/z : RT Weights) | Duplicate Row Filter | Min. Peaks in a Row | Min. Isotope Pattern Peaks | MS <sup>2</sup> Filtered    | Gap Filled |
|--------------|---------|-----------------------------|---------------|----------------|----------------------------|---------------------------|---------------------------|---------------------|--------------------|--------------------------------------------------------------------------------------------------|--------------------------------------|-------------------------------------------|-------------------------------------------------------------------|----------------------|---------------------|----------------------------|-----------------------------|------------|
| MSV000082081 | 7       | Q-Exactive                  | 17000         | 5              | <1sec                      | 1E5                       | 1E3                       | 10 ppm              | 0.02               | Baseline cut-off (Min peak height: 3E5, Peak dur 0.01 - 3 min, Baseline level 1E5)               | 0.01                                 | 0.1                                       | 10 ppm, 0.2 min, 75:25                                            | no                   | 2                   | 2                          | MS2 filter                  | yes        |
| MSV000084116 | 64      | Q-Exactive                  | 17000         | 15             | <1sec                      | 1E5                       | 1E3                       | 10 ppm              | 0.02               | Baseline cut-off (Min peak height: 3E5, Peak dur 0.01 - 3 min, Baseline level 1E5)               | 0.02                                 | 0.1                                       | 10 ppm, 0.15 min, 75:25                                           | no                   | 2                   | 2                          | no                          | yes        |
| MSV000084008 | 439     | QToF/<br>Maxis<br>Impact HD |               | 7.5            |                            | 1E3                       | 1E2                       | 0.01 m/z or 20 ppm  | 0.05               | Local minimum search (5.0%, 0.05 min, 5.0%, 3000, 2, 0.05 - 2.00 min)                            | 0.025                                | 0.01                                      | 0.01 m/z or 20.0 ppm, 0.1 min, 50:25                              | yes                  | 2                   | 2                          | only with MS2 or annotation | yes        |
| MSV000084099 | 556     | QToF/<br>Maxis<br>Impact HD |               | 12.5           |                            | 2E3                       | 9E1                       | 0.001 m/z or 20 ppm | 0.03               | Local minimum search (96%, 0.03 min, 5.0%, 2000, 1, 0.0 - 2.00 min)                              | 0.02                                 | 0.15                                      | 0.0015 m/z or 15 ppm, 0.2 min, 2:1                                | yes                  | 2                   | 2                          | no                          | no         |
| MSV000084119 | 26      | Q-Exactive                  | 70000         | 10             | <1s                        | 1E5                       | 1E3                       | 5 ppm               | 0.1                | local minimum search (1%, 0.05min, 1%, 1E5, 1, 0.1 - 3.00min)                                    | 0.01                                 | 0.2                                       | 10 ppm, 0.2 min, 75:25                                            | no                   | 2                   | 2                          | MS2 filter                  | yes        |
| MSV000084024 | 251     | QToF/<br>Maxis<br>Impact    |               | 8              | 3Hz<br>MS1/<br>10Hz<br>MS2 | 1E4                       | 1E2                       | 25 ppm              | 0.01               | Baseline cut-off (Min peak height 1.0E4; peak duration range 0.01-1.0 min; Baseline level 1.0E2) | 0.01                                 | 0.3                                       | 25 ppm, 0.2 min, 75:25                                            | no                   | 2                   | 2                          | only with MS2 or annotation | no         |
| MSV000082045 | 2249    | QToF/<br>Maxis<br>Impact    | 17000         | 10             | <1s                        | 1E3                       | 1E2                       | 20 ppm              | 0.05               | Local minimum search (5.0%, 0.05 min, 5.0%, 3000, 2, 0.05 - 2.00 min)                            | 0.01                                 | 0.05                                      | 20 ppm, 0.1 min, 50:34                                            | yes                  | 2                   | 2                          | MS2 filter                  | yes        |
| MSV000084101 | 411     | QToF/<br>Maxis<br>Impact    |               |                |                            | 2E3                       | 9E1                       | 0.001 m/z or 20 ppm | 0.03               | Local minimum search (96%, 0.03 min, 5.0%, 2000, 1, 0.0 - 2.00 min)                              | 0.02                                 | 0.15                                      | 0.0015 m/z or 15ppm, 0.2 min, 2:1                                 | no                   | 2                   | 2                          | no                          | no         |
| MSV000083729 | 298     | Q-Exactive                  | 17000         |                | <1s                        | 1E5                       | 1E3                       | 0.005 m/z or 10 ppm | 0.02               | Local minimum search (1%, 0.05min, 1%, 3000, 1.5, 0.05 - 2.00min)                                | 0.01                                 | 0.1                                       | 0.01 m/z or 10ppm, 0.2 min, 75:25                                 | no                   | 2                   | 2                          | no                          | no         |
| MSV000083772 | 80      | Q-Exactive                  | 17000         |                | <1s                        | 1E5                       | 1E3                       | 0.005 m/z or 10 ppm | 0.02               | Local minimum search (1%, 0.05min, 1%, 3000, 1.5, 0.05 - 2.00min)                                | 0.01                                 | 0.1                                       | 0.01 m/z or 10ppm, 0.2 min, 75:25                                 | no                   | 2                   | 2                          | no                          | no         |



Supplementary Table 4: continued

| ID           | Samples | MS Instrument        | MS Resolution | Gradient [min] | Duty Cycle Time | MS <sup>1</sup> threshold | MS <sup>2</sup> Threshold | MS Tolerance        | RT Tolerance [min] | Chromatogram Deconvolution Algorithm                                                | MS <sup>2</sup> Paring m/z Tolerance | MS <sup>2</sup> Paring RT Tolerance [min] | Feature Alignment (m/z Tolerance, RT Tolerance, m/z : RT Weights) | Duplicate Row Filter | Min. Peaks in a Row | Min. Isotope Pattern Peaks | MS <sup>2</sup> Filtered    | Gap Filled |
|--------------|---------|----------------------|---------------|----------------|-----------------|---------------------------|---------------------------|---------------------|--------------------|-------------------------------------------------------------------------------------|--------------------------------------|-------------------------------------------|-------------------------------------------------------------------|----------------------|---------------------|----------------------------|-----------------------------|------------|
| MSV000083601 | 76      | Q-ToF/micrO TOF-QII  | 18000         | 25             |                 | 1E3                       | 1E2                       | 20 ppm              | 0.02               | Local minimum search (1.0%, 0.15 min, 1.0%, 1000, 1.5, 0.10 - 2.00 min)             | 0.05                                 | 0.2                                       | 20 ppm, 0.3 min, 75:25                                            | no                   | 2                   | NA                         |                             | no         |
| MSV000084045 | 11      | Q-Exactive           | 17000         | 5              | <1s             | 1E5                       | 1E3                       | 10 ppm              | 0.02               | Baseline cut-off (Min peak height: 1E5, Peak dur 0.01 - 2 min, Baseline level 1E5)  | 0.01                                 | 0.1                                       | 0.01 m/z or 10 ppm, 0.1 min, 75:25                                | no                   | 2                   | 2                          | only with MS2 or annotation | yes        |
| MSV000084112 | 116     | Q-Exactive           | 32000         | 12.5           |                 | 1E5                       | 5E2                       | 0.01 m/z or 20 ppm  | 0.05               | Local minimum search (0.01%, 0.04 min, 0.01%, 1E5, 2 0.05 - 0.50 min)               | 0.01                                 | 0.1                                       | 0.01 m/z or 20 ppm, 0.3 min, 75:25                                | No                   | 2                   | no                         |                             | yes        |
| MSV000082630 | 449     | Q-Exactive           | 32000         | 12.5           |                 | 2E5                       | 1E2                       | 0.005 m/z or 10 ppm | 0.05               | Baseline cut-off (Min peak height 6E5, Peak dur 0.05-0.4 min, Baseline level 2E5)   | 0.01                                 | 0.1                                       | 0.005 m/z or 10 ppm, 0.3 min, 75:25                               | no                   | 2                   | 0                          | no                          | yes        |
| MSV000084007 | 45      | QToF/5600 Triple TOF |               | 8              | <2s             | 5E2                       | 1E1                       | 20 ppm              | 0.15               | Baseline cut-off (Min peak height 1.8E3, Peak dur 0-3 min, Baseline level 1E3)      | 0.02                                 | 0.15                                      | 20 ppm, 0.15 min, 75:25                                           | no                   | 2                   | 2                          | no                          | no         |
| MSV000084056 | 9       | Q-ToF/micrO TOF-QII  |               | 62             |                 | 3E3                       | 5E1                       | 20 ppm              | 0.1                | Local minimum search (1.0%, 0.1 min, 1.0%, 4000, 1.2, 0.1 - 2.00 min)               | 0.02                                 | 0.1                                       | 20 ppm, 0.1 min, 75:25                                            | no                   | 3                   | 2                          |                             | no         |
| MSV000084107 | 129     | Q-Exactive plus      | 35000         | 18             |                 | 5E5                       | 5E2                       | 10 ppm              | 0.1                | Local minimum search (30%, 0.1 min, 5.0%, 1500, 2, 0 - 2.00 min)                    | 0.02                                 | 0.1                                       | 7 ppm, 0.2 min, 2:1                                               | yes                  | 2                   | 2                          | no                          | yes        |
| MSV000084063 | 9       | Q-ToF/micrO TOF-QII  | 18000         | 25             |                 | 1E3                       | 1E2                       | 20 ppm              | 0.1                | Local minimum search (1.0%, 0.1 min, 1.0%, 1000, 1.5, 0.1 - 2.00 min)               | 0.05                                 | 0.2                                       | 20 ppm, 0.5 min, 75:25                                            | no                   | 2                   |                            |                             | no         |
| MSV000081832 | 49      | QToF/Maxis Impact    | 17000         |                |                 | 1E3                       | 1E2                       | 20 ppm              | 0.05               | Baseline cut-off (Min peak height 1.0E3, Peak dur 0.01-3 min, Baseline level 1.0E3) | 0.01                                 | 0.1                                       | 20 ppm, 0.1 min, 75:25                                            | no                   | 2                   | 2                          | only with MS2 or annotation | yes        |
| MSV000084134 | 15      | LIQ-Orbitrap XL      | 30000         | 30             |                 | 3E4                       | 1E4                       | 10 ppm              | 0.1                | Local minimum search (65%, 0.08 min, 0%, 6E4, 1.5, 0-3 min)                         | 0.2                                  | 0.2                                       | 0.002 m/z or 7 ppm, 0.2 min, 3:1                                  | no                   | 2                   | 0                          | only with MS2 or annotation | yes        |

Supplementary Table 4: continued

| ID           | Samples | MS Instrument      | MS Resolution | Gradient [min] | Duty Cycle Time | MS <sup>1</sup> threshold | MS <sup>2</sup> Threshold | MS Tolerance | RT Tolerance [min] | Chromatogram Deconvolution Algorithm                             | MS <sup>2</sup> Paring m/z Tolerance | MS <sup>2</sup> Paring RT Tolerance [min] | Feature Alignment (m/z Tolerance, RT Tolerance, m/z : RT Weights) | Duplicate Row Filter | Min. Peaks in a Row | Min. Isotope Pattern Peaks | MS <sup>2</sup> Filtered    | Gap Filled |
|--------------|---------|--------------------|---------------|----------------|-----------------|---------------------------|---------------------------|--------------|--------------------|------------------------------------------------------------------|--------------------------------------|-------------------------------------------|-------------------------------------------------------------------|----------------------|---------------------|----------------------------|-----------------------------|------------|
| MSV000084148 | 14      | LTO-Orbitrap XL    | 30000         | 30             |                 | 1E4                       | 2E4                       | 10 ppm       | 0.1                | Local minimum search (85%, 0.1 min, 0%, 2E4, 1.4, 0-2 min)       | 0.2                                  | 0.08                                      | 0.0015 m/z or 8 ppm, 0.1 min, 3:1                                 | yes                  | 3                   | 0                          | only with MS2 or annotation | yes        |
| MSV000084158 | 13      | LTO-Orbitrap Elite | 120000        | 20             | <2s             | 1E4                       | 1E2                       | 10 ppm       | 0.15               | Local minimum search (5%, 0.2 min, 5%, 2E4, 1, 0.02-5 min)       | 0.01                                 | 0.15                                      | 10 ppm, 0.2 min, 75:25                                            | no                   | 2                   | 0                          | MS2 filter                  | yes        |
| MSV000084170 | 88      | QToF/Maxis Impact  | 17000         | 8              |                 | 8E2                       | 8E1                       | 20 ppm       | 0.1                | Local minimum search (98.5%, 0.08 min, 0%, 6E3, 1, 0.03-1.5 min) | 0.03                                 | 0.1                                       | 0.01 m/z or 20 ppm, 0.1 min, 75:25                                | yes                  | 1                   | 2                          | no                          | yes        |
| MSV000084118 | 9       | Q-Exactive         | 17000         | 10             | <1sec           | 1E5                       | 1E3                       | 10 ppm       | 0.15               | Local minimum search (5%, 0.2 min, 5%, 2E4, 1, 0.02-5 min)       | 0.01                                 | 0.15                                      | 10 ppm, 0.2 min, 75:25                                            | no                   | 2                   | 0                          | MS2 filter                  | yes        |

**Supplementary Table 5:** Description of all statistical measures that were extracted for each dataset.

| Measure                                                                                                                                                                                                       | Description                                                                                                                                                                                                                                                  |
|---------------------------------------------------------------------------------------------------------------------------------------------------------------------------------------------------------------|--------------------------------------------------------------------------------------------------------------------------------------------------------------------------------------------------------------------------------------------------------------|
| Metadata                                                                                                                                                                                                      |                                                                                                                                                                                                                                                              |
| MassIVE ID                                                                                                                                                                                                    | ID to access the publicly available dataset in the MassIVE repository                                                                                                                                                                                        |
| Sample origin                                                                                                                                                                                                 | Study and sample descriptor (e.g., Standards, Urine,..)                                                                                                                                                                                                      |
| MS type                                                                                                                                                                                                       | Mass analyzer type (FTMS or qTOF)                                                                                                                                                                                                                            |
| Machine type                                                                                                                                                                                                  | Name of the mass spectrometer                                                                                                                                                                                                                                |
| Summary of IIMN+FBMN statistics                                                                                                                                                                               |                                                                                                                                                                                                                                                              |
| Total nodes                                                                                                                                                                                                   | All feature nodes (might include nodes without MS <sup>2</sup> )                                                                                                                                                                                             |
| Total nodes with MS <sup>2</sup>                                                                                                                                                                              | All feature nodes with MS <sup>2</sup> spectrum                                                                                                                                                                                                              |
| Library matches (MS <sup>2</sup> )                                                                                                                                                                            | Matches to the GNPS spectral libraries (= annotations)                                                                                                                                                                                                       |
| Ion identities (MS <sup>1</sup> )                                                                                                                                                                             | Nodes with ion identity annotation based on MS <sup>1</sup>                                                                                                                                                                                                  |
| Ion identities with MS <sup>2</sup>                                                                                                                                                                           | Nodes with ion identity annotation that have an MS <sup>2</sup> spectrum                                                                                                                                                                                     |
| MS <sup>2</sup> with ion identity %                                                                                                                                                                           | Nodes with ion identity relative to total nodes with MS <sup>2</sup>                                                                                                                                                                                         |
| Library matches + ion identity                                                                                                                                                                                | Library matches with ion identities                                                                                                                                                                                                                          |
| Library matches + ion identity %                                                                                                                                                                              | Relative to all library matches                                                                                                                                                                                                                              |
| Ion identity networks                                                                                                                                                                                         | Number of ion identity networks, representing connected ion identities which point to the same neutral molecular mass                                                                                                                                        |
| All measures below were calculated in regards to nodes with a minimum number of MS <sup>2</sup> signals, filtered with n=0,1,4,6 signals. FBMN and IIMN comparisons are based on results for n=0 (no filter). |                                                                                                                                                                                                                                                              |
| MS <sup>2</sup> scans                                                                                                                                                                                         | Nodes with a spectrum with at least n signals                                                                                                                                                                                                                |
| Annotated                                                                                                                                                                                                     | Annotated nodes with at least n MS <sup>2</sup> signals                                                                                                                                                                                                      |
| Annotated %                                                                                                                                                                                                   | Relative to all nodes with MS <sup>2</sup> scans with at least n signals                                                                                                                                                                                     |
| Singletons FBMN / IIMN                                                                                                                                                                                        | Nodes that have no connecting FBMN edge / nodes that have no connecting IIMN edge                                                                                                                                                                            |
| Singletons FBMN / IIMN%                                                                                                                                                                                       | Relative to all nodes with MS <sup>2</sup> scans with at least n signals                                                                                                                                                                                     |
| Nodes reduced by IIN                                                                                                                                                                                          | Redundant nodes that describe the same neutral molecule are reduced by collapsing all ion identities of an IIN into a singular neutral molecule node "M". An IIN with 3 ions (nodes) would then result in a reduction of 2 nodes for the remaining "M"-node. |
| Nodes reduced by IIN %                                                                                                                                                                                        | Relative to all nodes with MS <sup>2</sup> scans with at least n signals                                                                                                                                                                                     |

**Supplementary Table 5: continued**

| Measure                                                                                                                                                                                                                                                                                                               | Description                                                                                                                                                                                                                                                                                                                                                              |
|-----------------------------------------------------------------------------------------------------------------------------------------------------------------------------------------------------------------------------------------------------------------------------------------------------------------------|--------------------------------------------------------------------------------------------------------------------------------------------------------------------------------------------------------------------------------------------------------------------------------------------------------------------------------------------------------------------------|
| Remaining nodes after reduction                                                                                                                                                                                                                                                                                       | MS <sup>2</sup> scans - nodes reduced by IIN                                                                                                                                                                                                                                                                                                                             |
| Possible new library spectra by IIN                                                                                                                                                                                                                                                                                   | Counts all nodes (MS <sup>2</sup> spectra) without a direct match to the GNPS spectral libraries but with an IIN edge to at least one identified node. The count will be 2 if one or more nodes in an ion identity network are identified by a spectral library match and connected to 2 additional unidentified ion identities with at least n MS <sup>2</sup> signals. |
| Identification density as the distance to an annotated node (each node only counts once even if connected to multiple annotated compounds) in regards to nodes with a minimum number of MS <sup>2</sup> signals, filtered with n=0,1,4,6 signals. FBMN and IIMN comparisons are based on results for n=0 (no filter). |                                                                                                                                                                                                                                                                                                                                                                          |
| Distance 0,1,2,3,4,5 edges                                                                                                                                                                                                                                                                                            | Number of nodes with a minimum distance (0-5 edges) to an identified node with a spectral library match. Comparison between FBMN MS <sup>2</sup> -based edges only and IIMN (MS <sup>2</sup> +MS <sup>1</sup> -based) networks.                                                                                                                                          |
| Distance 0,1,2,3,4,5 edges %                                                                                                                                                                                                                                                                                          | Relative to all nodes with MS <sup>2</sup> scans with at least n signals (identification density over n edges)                                                                                                                                                                                                                                                           |
| Ion identity networks statistics                                                                                                                                                                                                                                                                                      |                                                                                                                                                                                                                                                                                                                                                                          |
| Adduct distribution                                                                                                                                                                                                                                                                                                   | List of all ion identities and their occurrence in the dataset                                                                                                                                                                                                                                                                                                           |
| NetID                                                                                                                                                                                                                                                                                                                 | The network identifier number. All nodes with an ion identity point to a specific netID.                                                                                                                                                                                                                                                                                 |
| Net size                                                                                                                                                                                                                                                                                                              | Number of feature nodes in a network                                                                                                                                                                                                                                                                                                                                     |
| Nodes with MS <sup>2</sup>                                                                                                                                                                                                                                                                                            | Number of nodes with an MS <sup>2</sup> spectrum                                                                                                                                                                                                                                                                                                                         |
| Identified                                                                                                                                                                                                                                                                                                            | Nodes with a match to the GNPS spectral libraries                                                                                                                                                                                                                                                                                                                        |
| All ions                                                                                                                                                                                                                                                                                                              | All ion identities (e.g., [M+H] <sup>+</sup> )                                                                                                                                                                                                                                                                                                                           |
| Ions matched library                                                                                                                                                                                                                                                                                                  | All ion identities with a library match                                                                                                                                                                                                                                                                                                                                  |
| Reduction by                                                                                                                                                                                                                                                                                                          | Reduction of nodes by collapsing IINs into a single neutral molecule-node. (Nodes with MS <sup>2</sup> -1)                                                                                                                                                                                                                                                               |
| Possible new library entries with n signals (n=3,4,6)                                                                                                                                                                                                                                                                 | If IIN has at least one identified node: List of ion identities with no match to the GNPS spectral libraries but at least n MS <sup>2</sup> signals.                                                                                                                                                                                                                     |

**Supplementary Table 6:** Links to the GNPS IIMN job pages for each dataset provide options for downloading the results and analyzing them in the GNPS web interfaces. The IIMN workflow parameters are available by job cloning, which further enables reanalysis.

| #  | MassIVE ID   | GNPS Job                                                                                                                                                                          |
|----|--------------|-----------------------------------------------------------------------------------------------------------------------------------------------------------------------------------|
| 1  | MSV000082081 | <a href="https://gnps.ucsd.edu/ProteoSAFe/status.jsp?task=97cc00c7187040db9efeb9558694bed6">https://gnps.ucsd.edu/ProteoSAFe/status.jsp?task=97cc00c7187040db9efeb9558694bed6</a> |
| 2  | MSV000084116 | <a href="https://gnps.ucsd.edu/ProteoSAFe/status.jsp?task=7a896f99dd474cac95e651f83f873ea0">https://gnps.ucsd.edu/ProteoSAFe/status.jsp?task=7a896f99dd474cac95e651f83f873ea0</a> |
| 3  | MSV000084008 | <a href="https://gnps.ucsd.edu/ProteoSAFe/status.jsp?task=0a0b1e6d245e43a5a2fc5b3caaf37f3b">https://gnps.ucsd.edu/ProteoSAFe/status.jsp?task=0a0b1e6d245e43a5a2fc5b3caaf37f3b</a> |
| 4  | MSV000084099 | <a href="https://gnps.ucsd.edu/ProteoSAFe/status.jsp?task=aa077cf9013249de91edd87c27783173">https://gnps.ucsd.edu/ProteoSAFe/status.jsp?task=aa077cf9013249de91edd87c27783173</a> |
| 5  | MSV000084119 | <a href="https://gnps.ucsd.edu/ProteoSAFe/status.jsp?task=b56ba768f495427299e62f4aa4efab3e">https://gnps.ucsd.edu/ProteoSAFe/status.jsp?task=b56ba768f495427299e62f4aa4efab3e</a> |
| 6  | MSV000084024 | <a href="https://gnps.ucsd.edu/ProteoSAFe/status.jsp?task=c5b6d1782a7842aea1a852c43ab06033">https://gnps.ucsd.edu/ProteoSAFe/status.jsp?task=c5b6d1782a7842aea1a852c43ab06033</a> |
| 7  | MSV000082045 | <a href="https://gnps.ucsd.edu/ProteoSAFe/status.jsp?task=e8c8622636854be3a3e32fb08bfc3536">https://gnps.ucsd.edu/ProteoSAFe/status.jsp?task=e8c8622636854be3a3e32fb08bfc3536</a> |
| 8  | MSV000084101 | <a href="https://gnps.ucsd.edu/ProteoSAFe/status.jsp?task=d97eb96c693d43c08fd0c9999cc2ada7">https://gnps.ucsd.edu/ProteoSAFe/status.jsp?task=d97eb96c693d43c08fd0c9999cc2ada7</a> |
| 9  | MSV000083729 | <a href="https://gnps.ucsd.edu/ProteoSAFe/status.jsp?task=328bbf4d8a5042b89de7c3042c668cab">https://gnps.ucsd.edu/ProteoSAFe/status.jsp?task=328bbf4d8a5042b89de7c3042c668cab</a> |
| 10 | MSV000083772 | <a href="https://gnps.ucsd.edu/ProteoSAFe/status.jsp?task=db2749854d9f4b369b2ea2cfd6de0b90">https://gnps.ucsd.edu/ProteoSAFe/status.jsp?task=db2749854d9f4b369b2ea2cfd6de0b90</a> |
| 11 | MSV000083601 | <a href="https://gnps.ucsd.edu/ProteoSAFe/status.jsp?task=79a0bf62e64e4e5fa284e37a3bb5f9a2">https://gnps.ucsd.edu/ProteoSAFe/status.jsp?task=79a0bf62e64e4e5fa284e37a3bb5f9a2</a> |
| 12 | MSV000084045 | <a href="https://gnps.ucsd.edu/ProteoSAFe/status.jsp?task=4a5a472d271f4234991ee9f8012b71ea">https://gnps.ucsd.edu/ProteoSAFe/status.jsp?task=4a5a472d271f4234991ee9f8012b71ea</a> |
| 13 | MSV000084112 | <a href="https://gnps.ucsd.edu/ProteoSAFe/status.jsp?task=8ac11424b0844dd2822b97006c46427f">https://gnps.ucsd.edu/ProteoSAFe/status.jsp?task=8ac11424b0844dd2822b97006c46427f</a> |
| 14 | MSV000082630 | <a href="https://gnps.ucsd.edu/ProteoSAFe/status.jsp?task=b5a98589efb24810897944cfb801d800">https://gnps.ucsd.edu/ProteoSAFe/status.jsp?task=b5a98589efb24810897944cfb801d800</a> |
| 15 | MSV000084007 | <a href="https://gnps.ucsd.edu/ProteoSAFe/status.jsp?task=2ee81a5ed11441af822e211c775d6a3d">https://gnps.ucsd.edu/ProteoSAFe/status.jsp?task=2ee81a5ed11441af822e211c775d6a3d</a> |
| 16 | MSV000084056 | <a href="https://gnps.ucsd.edu/ProteoSAFe/status.jsp?task=c0cdbc675607454c8c4c2985e03bdc01">https://gnps.ucsd.edu/ProteoSAFe/status.jsp?task=c0cdbc675607454c8c4c2985e03bdc01</a> |
| 17 | MSV000084107 | <a href="https://gnps.ucsd.edu/ProteoSAFe/status.jsp?task=7ba1a6a1a0934596bac5dfaf55290f81">https://gnps.ucsd.edu/ProteoSAFe/status.jsp?task=7ba1a6a1a0934596bac5dfaf55290f81</a> |
| 18 | MSV000084063 | <a href="https://gnps.ucsd.edu/ProteoSAFe/status.jsp?task=2b93b1072d84497a86d92364e8c515ce">https://gnps.ucsd.edu/ProteoSAFe/status.jsp?task=2b93b1072d84497a86d92364e8c515ce</a> |
| 19 | MSV000081832 | <a href="https://gnps.ucsd.edu/ProteoSAFe/status.jsp?task=9eacca5cd179499ea35ba15c60b14c0d">https://gnps.ucsd.edu/ProteoSAFe/status.jsp?task=9eacca5cd179499ea35ba15c60b14c0d</a> |
| 20 | MSV000084134 | <a href="https://gnps.ucsd.edu/ProteoSAFe/status.jsp?task=0308d797c31a477292fe009030d03da7">https://gnps.ucsd.edu/ProteoSAFe/status.jsp?task=0308d797c31a477292fe009030d03da7</a> |
| 21 | MSV000084148 | <a href="https://gnps.ucsd.edu/ProteoSAFe/status.jsp?task=a5480529261b4a13bb867f2edad1dcbe">https://gnps.ucsd.edu/ProteoSAFe/status.jsp?task=a5480529261b4a13bb867f2edad1dcbe</a> |
| 22 | MSV000084158 | <a href="https://gnps.ucsd.edu/ProteoSAFe/status.jsp?task=de2afe9697aa450fba5b6c0b0d876bbd">https://gnps.ucsd.edu/ProteoSAFe/status.jsp?task=de2afe9697aa450fba5b6c0b0d876bbd</a> |
| 23 | MSV000084170 | <a href="https://gnps.ucsd.edu/ProteoSAFe/status.jsp?task=3f5c4666eb9f4f42aedf2e36bead34a5">https://gnps.ucsd.edu/ProteoSAFe/status.jsp?task=3f5c4666eb9f4f42aedf2e36bead34a5</a> |
| 24 | MSV000084118 | <a href="https://gnps.ucsd.edu/ProteoSAFe/status.jsp?task=fb1461d9099042529511e4c3ccb32572">https://gnps.ucsd.edu/ProteoSAFe/status.jsp?task=fb1461d9099042529511e4c3ccb32572</a> |

## Supplementary References

1. Aron, A. *et al.* Native Electrospray-based Metabolomics Enables the Detection of Metal-binding Compounds. doi:10.1101/824888.
2. Jagels, A. *et al.* Exploring Secondary Metabolite Profiles of *Stachybotrys* spp. by LC-MS/MS. *Toxins* **11**, (2019).
3. Horai, H. *et al.* MassBank: a public repository for sharing mass spectral data for life sciences. *J. Mass Spectrom.* **45**, 703–714 (2010).
4. Wang, M. *et al.* Sharing and community curation of mass spectrometry data with Global Natural Products Social Molecular Networking. *Nat. Biotechnol.* **34**, 828–837 (2016).
5. Vargas, F. *et al.* Protocol for Community-created Public MS/MS Reference Library Within the GNPS Infrastructure. *bioRxiv* 804401 (2019) doi:10.1101/804401.
